# Supplementary material for: Identification of Synaptic Targets of Drosophila Pumilio
Source: PLoS Comput Biol. 2008 Feb 29;4(2):e1000026. doi: 10.1371/journal.pcbi.1000026 (PMC2265480; doi:10.1371/journal.pcbi.1000026)
Supplement: Table S1 — NRE_PAT Predictions (0.02 MB XLS) [file pcbi.1000026.s007.xls]

## Sheet: NRE_pat_moderate.synaptic.scan_
search pat:	(GTTGT)(.{3,45}?)(ATTGTA)
D. mel. gene annotaton				D. mel. 3UTR		putative D. pseudo. 3UTR		D. mel. 3UTR seq locatoin in genome
gene	name	FBgn	transcripts	length	pattern match	length	pattern match	coordinates	strand	chr
CG1725	dlg1	FBgn0001624	CG1725-RA_RD	1572	1491-1534 (GTTGT..33..ATTGTA)a1	1778	1707-1740(GTTGT..23..ATTGTA),	11148115-11149686,	+	chrX
CG18069	CaMKII	FBgn0004624	CG18069-RA_RB_RC	1258	248-274 (GTTGT..16..ATTGTA)	1306	NO_MATCH	1055475-1056732,	-	chr4
CG4427	EP2237	FBgn0043364	CG4427-RA_RB	553	401-443 (GTTGT..32..ATTGTA)	611	NO_MATCH	478102-478654,	-	chr2L
CG8118	mam	FBgn0002643	CG8118-RA_RB	2445	716-735 (GTTGT..9..ATTGTA)n		NO_SEQ	9122626-9125070,	+	chr2R
CG9113	AP-1gamma	FBgn0030089	CG9113-RA_RB_RC_RD	257	122-141 (GTTGT..9..ATTGTA)n		NO_SEQ	8855244-8855500,	+	chrX
Notations for some columns
FBgn: FlyBase gene ID
transcripts: the transcripts that share the same 3UTR. For example, CG6395-RB_RC means CG6395-RB and CG6395-RC, whose 3UTR are identical.
pattern match: represented as "start-end coordinates (matched sequence)". The number between the dots represents the length of the sequence between the two boxes. Coordinates are referred to the stop codon (the first nucleotide of the stop codon as coordinate 1).
The suffix in D. mel. pattern match represents the conservation between D. mel. and D. pseudo. Example: a2 - the predicted site is aligned with the second predicted site in D. pseudo. o1 - the predicted site overlaps with the first predicted site in D. pseudo. n - correspondent 3'UTR sequence in D. pseudo is not available.
