# Supplementary material for: Identification of Synaptic Targets of Drosophila Pumilio
Source: PLoS Comput Biol. 2008 Feb 29;4(2):e1000026. doi: 10.1371/journal.pcbi.1000026 (PMC2265480; doi:10.1371/journal.pcbi.1000026)
Supplement: Table S3 — NRE_M10 Predictions (0.02 MB XLS) [file pcbi.1000026.s009.xls]

## Sheet: NRE_mat_nr2_w10.synaptic.th10.s
D. mel. gene annotaton				D. mel. 3UTR			putative ortholog D. pseudo. 3UTR			D. mel. 3UTR seq locatoin in genome
gene	name	FBgn	transcripts	length	matrix hits	putative polyA signal	length	matrix hits	putative polyA signal	coordinates	strand	chr
CG1099	Dap160	FBgn0023388	CG1099-RA_RB	351	15.21(321)	ATTAAA(5)	450	NO_HIT	ATTAAA(5)	21106873-21107223,	-	chr2L
CG11059	calsyntenin-1	FBgn0039928	CG11059-RA_RB	652	13.03(203)n	AATAAA(93)		NO_SEQ		1134646-1135297,	-	chr4
CG1107	auxillin	FBgn0037218	CG1107-RA_RB	664	10.40(477)	AATAAA(44)	743	10.28(599)	AATAAA(46)	52580-53243,	+	chr3R
CG1210	Pk61C	FBgn0020386	CG1210-RA_RB_RC_RD_RE_RF_RG_RH	1488	10.40(1155)n	AATAAA(32)		NO_SEQ		124448-125935,	+	chr3L
CG1522	cac	FBgn0005563	CG1522-RA	2362	10.24(1392)	NO_POLYA_SIG	2749	NO_HIT	NO_POLYA_SIG	11664344-11666705,	-	chrX
CG1725	dlg1	FBgn0001624	CG1725-RA_RD	1572	12.57(367)a1	AATATA(11)	1778	12.57(263)	AATATA(11)	11148115-11149686,	+	chrX
CG17870	14-3-3zeta	FBgn0004907	CG17870-RA_RB_RC_RD_RE_RG	2068	11.77(1174)a1	AATAAA(13)	2473	11.77(1165),12.57(1761)	ATTAAA(40)	5168253-5170320,	+	chr2R
CG17870	14-3-3zeta	FBgn0004907	CG17870-RF	2228	11.77(1334)a1	AATAAA(13)	2633	11.77(1325),12.57(1921)	ATTAAA(40)	5167424-5167430,5168100-5170320,	+	chr2R
CG17907	Ace	FBgn0000024	CG17907-RA	1421	14.78(814)a1, 10.34(1229)a2	ATTAAA(28)	1714	14.78(927),10.34(1520)	ATTAAA(32)	9053981-9055401,	-	chr3R
CG3161	Vha16	FBgn0004145	CG3161-RA_RB_RC_RD	560	10.40(201)	ATTAAA(47)	527	NO_HIT	ATTAAA(44)	1687815-1688374,	-	chr2R
CG32490	complexin	FBgn0041605	CG32490-RA_RC	2782	12.20(1388)	AATAAA(37)	2652	NO_HIT	AATAAA(57)	123280-124306,125511-127265,	+	chr3R
CG32490	complexin	FBgn0041605	CG32490-RG_RH_RI	2779	12.20(1388)	AATAAA(34)	2649	NO_HIT	AATAAA(54)	123280-124306,125511-127262,	+	chr3R
CG4209	CanB	FBgn0010014	CG4209-RA	621	10.24(37)	ATTAAA(18)	1363	NO_HIT	ATTAAA(18)	5074529-5075149,	+	chrX
CG4427	EP2237	FBgn0043364	CG4427-RA_RB	553	10.40(318)	AATATA(23)	611	NO_HIT	AATATA(23)	478102-478654,	-	chr2L
CG5393	apt	FBgn0015903	CG5393-RA_RB_RC_RD_RE	1176	10.40(555)a1	NO_POLYA_SIG	1364	10.40(560)	NO_POLYA_SIG	18642093-18643268,	+	chr2R
CG5864	AP-1sigma	FBgn0039132	CG5864-RA	463	10.78(149)	AATAAA(32)	407	NO_HIT	AATAAA(32)	19778472-19778934,	+	chr3R
CG6027	cdi	FBgn0004876	CG6027-RA	1738	11.02(772)	AATAAA(24)	1666	10.28(1204)	AATAAA(22)	14870621-14872358,	-	chr3R
CG6395	Csp	FBgn0004179	CG6395-RA	1979	13.95(87), 10.13(1537)a1	AATAAA(17)	2508	10.13(1936)	AATAAA(44)	22189046-22191024,	+	chr3L
CG6395	Csp	FBgn0004179	CG6395-RB_RC	1358	10.13(916)a1	AATAAA(17)	1726	10.13(1154)	AATAAA(44)	22189667-22191024,	+	chr3L
CG7057	AP-50	FBgn0024832	CG7057-RA_RB	574	13.53(430)	AATAAA(25)	583	13.03(304)	AATAAA(22)	18280416-18280989,	+	chr3R
CG7503	Con	FBgn0005775	CG7503-RA	856	15.21(57)a1	AATAAA(19)	1213	15.21(66)	AATAAA(19)	4916356-4917211,	-	chr3L
CG7734	shn	FBgn0003396	CG7734-RA_RB_RC	1202	10.78(895)a1, 14.78(983)a2	AATAAA(9)	1386	10.78(1063),14.78(1157)	AATAAA(9)	6280941-6282142,	+	chr2R
CG8095	scb	FBgn0003328	CG8095-RA_RB	786	13.03(664)	AATAAA(25)	556	NO_HIT	AATAAA(35)	10321438-10322223,	+	chr2R
CG8118	mam	FBgn0002643	CG8118-RA_RB	2445	10.40(1037)n	AATAAA(25)		NO_SEQ		9122626-9125070,	+	chr2R
CG8156	Arf51F	FBgn0013750	CG8156-RA_RB_RC_RD_RE	553	13.46(481)o1	AATAAA(20)	556	13.46(487)	AATAAA(16)	10388067-10388619,	+	chr2R
CG8203	Cdk5	FBgn0013762	CG8203-RA	605	10.34(337)n	AATAAA(18)		NO_SEQ		10633255-10633859,	-	chr2R
CG8487	garz	FBgn0033714	CG8487-RB	329	10.78(288)o1	ATTAAA(20)	393	10.78(355)	AATATA(12)	7398207-7398535,	+	chr2R
CG9366	RhoL	FBgn0014380	CG9366-RA	225	13.03(192)	AATAAA(14)	232	NO_HIT	AATATA(5)	5322933-5323157,	-	chr3R
Notations for some columns
FBgn: FlyBase gene ID
transcripts: the transcripts that share the same 3UTR. For example, CG6395-RB_RC means CG6395-RB and CG6395-RC, whose 3UTR are identical.
matrix hits: the sites in the 3UTR sequence whose matrix score is above the threshold 10. The format is: score(coordinate). The coordinate corresponds to the first position in the matrix an is referred to the stop codon (the first nucleotide of the stop codon as coordinate 1).
The suffixes in D. mel. matrix hits represent the conservation between D. mel. and D. pseudo. Example: a2 - the predicted site is aligned with the second predicted site in D. pseudo. o1 - the predicted site overlaps with the first predicted site in D. pseudo. n - correspondent 3'UTR sequence in D. pseudo is not available.
putative polyA signal: the number in the parentheses is the distance to the end of the 3UTR. The presence of a putative polyA signal provides more confidence that the 3UTR is complete.
