# Supplementary material for: Identification of Synaptic Targets of Drosophila Pumilio
Source: PLoS Comput Biol. 2008 Feb 29;4(2):e1000026. doi: 10.1371/journal.pcbi.1000026 (PMC2265480; doi:10.1371/journal.pcbi.1000026)
Supplement: Table S4 — Segmentation Pattern in Embryos of Modified Hunchback Gene Transformant Lines (0.02 MB XLS) [file pcbi.1000026.s010.xls]

## Sheet: Sheet1
	hb1,2 line #5M			hb1,2 line #8M			hb1,2 line #9M			hb1,2 line #11M
	Number of segments	Numbers of eggs observed	percentage	Number of segments	Numbers of eggs observed	percentage	Number of segments	Numbers of eggs observed	percentage	Number of segments	Numbers of eggs observed	percentage
	8		1	8		1	8		1	8		1
	hb2 line #pc2M			hb2 line #pc9M			hb2 line #pc6M			hb2 line # pc10M
	Number of segments	Numbers of eggs observed	percentage	Number of segments	Numbers of eggs observed	percentage	Number of segments	Numbers of eggs observed	percentage	Number of segments	Numbers of eggs observed	percentage
	1	72	0.72	1	4	0.04	1	3	0.0366	6	1	0.0092
	0	28	0.28	0	96	0.96	0	79	0.9634	5	4	0.0367
										4	48	0.4404
										3	33	0.3028
										2	23	0.211
	hbΔ line #54-1			hbΔ line #54-2			hbΔ line #58-1			hbΔ line #79-1
	Number of segments	Numbers of eggs observed	percentage	Number of segments	Numbers of eggs observed	percentage	Number of segments	Numbers of eggs observed	percentage	Number of segments	Numbers of eggs observed	percentage
	0		1	0		1	0		1	0		1
	Ace line #22-1			Ace line #58-2			Ace line #59-2			Ace line #59-1
	Number of segments	Numbers of eggs observed	percentage	Number of segments	Numbers of eggs observed	percentage	Number of segments	Numbers of eggs observed	percentage	Number of segments	Numbers of eggs observed	percentage
	1	11	0.15	1	2	0.02	1	12	0.12	1	10	0.1
	0	61	0.85	0	98	0.98	0	89	0.88	0	90	0.9
	dlg1 line #6-1			dlg1 line #97-1			dlg1 line #12-1			dlg1 line #6-2
	Number of segments	Numbers of eggs observed	percentage	Number of segments	Numbers of eggs observed	percentage	Number of segments	Numbers of eggs observed	percentage	Number of segments	Numbers of eggs observed	percentage
	8	57	0.4071	8	4	0.0556	5	1	0.01	4	6	0.0588
	7	46	0.3286	7	29	0.4028	4	5	0.05	3.5	3	0.0294
	6.5	1	0.0071	6.5	3	0.0417	3.5	6	0.06	3	60	0.5882
	6	22	0.1571	6	29	0.4028	3	42	0.42	2.5	9	0.0882
	5	11	0.0786	5	7	0.0972	2.5	8	0.08	2	17	0.1667
	4	2	0.0143				2	21	0.21	1.5	4	0.0392
	3	0	0				1.5	2	0.02	1	0	0
	2.5	1	0.0071				1	8	0.08	0	3	0.0294
	2	0	0				0.5	1	0.01
	1	0	0				0	6	0.06
	Total/Average segments	140	7.02 +/- 0.09	Total/Average segments	72	6.5 +/- 0.09	Total/Average segments	100	2.54+/- 0.1	Total/Average segments	102	2.77+/-0.08
	dlg1-full line #1M			dlg1-full line #2M			dlg1-full line #3M			dlg1-full line #5M
	Number of segments	Numbers of eggs observed	percentage	Number of segments	Numbers of eggs observed	percentage	Number of segments	Numbers of eggs observed	percentage	Number of segments	Numbers of eggs observed	percentage
	0		1	0		1	0		1	0		1
	dlg1-anti line #49-1			dlg1-anti line #44-1			dlg1-anti line #55-2			dlg1-anti line #44-2
	Number of segments	Numbers of eggs observed	percentage	Number of segments	Numbers of eggs observed	percentage	Number of segments	Numbers of eggs observed	percentage	Number of segments	Numbers of eggs observed	percentage
	1	58	0.58	1	97	0.97	1	23	0.23	1	64	0.73
	0	42	0.42	0	3	0.03	0	77	0.77	0	24	0.27

## Sheet: Sheet2
Name of the Constructs	Characteristics
Casper4-control	A control sequence without NRE-like element is inserted into plasmid p1809 via SpeI site.
Casper4-hb2	Only the second NRE of hb fragment is synthesized and inserted into plasmid p1809 via SpeI site.
Casper4-ace NRE	Predicted NRE of the ace gene is synthesized and inserted into plasmid p1809 via SpeI site.
Casper4-dlg1 NRE	Predicted NRE of the dlg1 gene is synthesized and inserted into plasmid p1809 via SpeI site.
Casper4-dlg1-full	A ~1.2kb sequence of the dlg1 3’UTR is inserted into plasmid p1809 via SpeI site.
Casper4-dlg1-antisense	The sequence inserted is antisense of the sequence used for dlg1 full construct.
Casper4-hb NRE full	Both hb NREs are inserted to the plasmid p1809 via SpeI site.
